# Supplementary material
Source: publisher figshare collection journal article supplement (https://karger.figshare.com/ndownloader/files/21531288)
Supplement: Supplementary file 1 [file 21531288]

**Suppl. Table 1.** Comparison of clinical characteristics and surgical outcomes between the single stage and staged group.

|  | Single stage group (n=26) | Staged group (n=10) | ***P*** value |
| --- | --- | --- | --- |
| Age, median (range), y | 62.9 (19-81) | 61.0 (50-71) | 0.241 |
| Sex, n (%)  Male  Female | 12 (46.2)  14 (53.8) | 8 (80)  2 (20) | 0.133 |
| Implantation side  Right  Left | 11 (42.3)  15 (57.7) | 3 (30)  7 (70) | 0.706 |
| COM duration, median (range), y | 12.0 (1-50) | 23.5 (1-47) | 0.768 |
| Preoperative CAP score, median (range) | 1 (0-3) | 0 (0-3) | 0.074 |
| Preoperative sentence score, median (range), % | 0 (0-36) | 0 (0-28) | 0.087 |
| Major complication  Yes  No | 1 (3.8)  25 (96.2) | 2 (20)  8 (80) | 0.181 |
| Postoperative CAP score, median (range) | 5 (4-7) | 6 (5-7) | 0.497 |
| Postoperative sentence score, median (range) % | 78 (51-100) | 76.5 (45-91) | 0.475 |

COM, chronic otitis media; CAP, categories of performance
